# Supplementary material for: Large-scale electron microscopy database for human type 1 diabetes
Source: PubMed Central journal article supplement (PMC7235089; doi:10.1038/s41467-020-16287-5), 2020-05-18
Supplement: 41467_2020_16287_MOESM1_ESM.pdf [file 41467_2020_16287_MOESM1_ESM.pdf]

**Extended data**

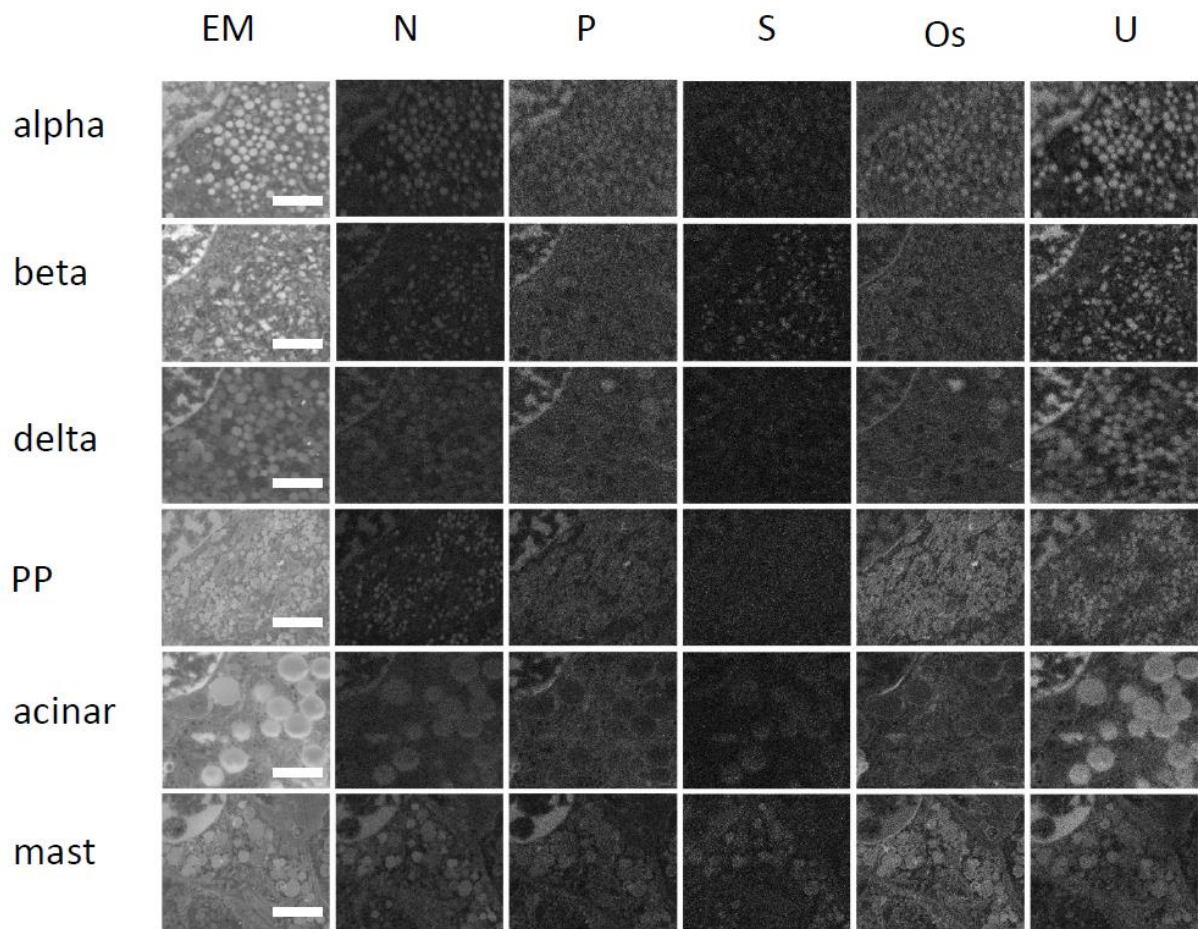

**Extended figure 1 | Raw EDX data from different cell types.** Elemental specific images displaying nitrogen (N), phosphorus (P), sulfur (S), osmium (Os), and uranium (U) are shown. Micrographs are representative and similar results can be obtained from each dataset. See figure 1c for further details. Bars: 2  $\mu$ m, indicated in EM micrographs and identical for elemental maps.

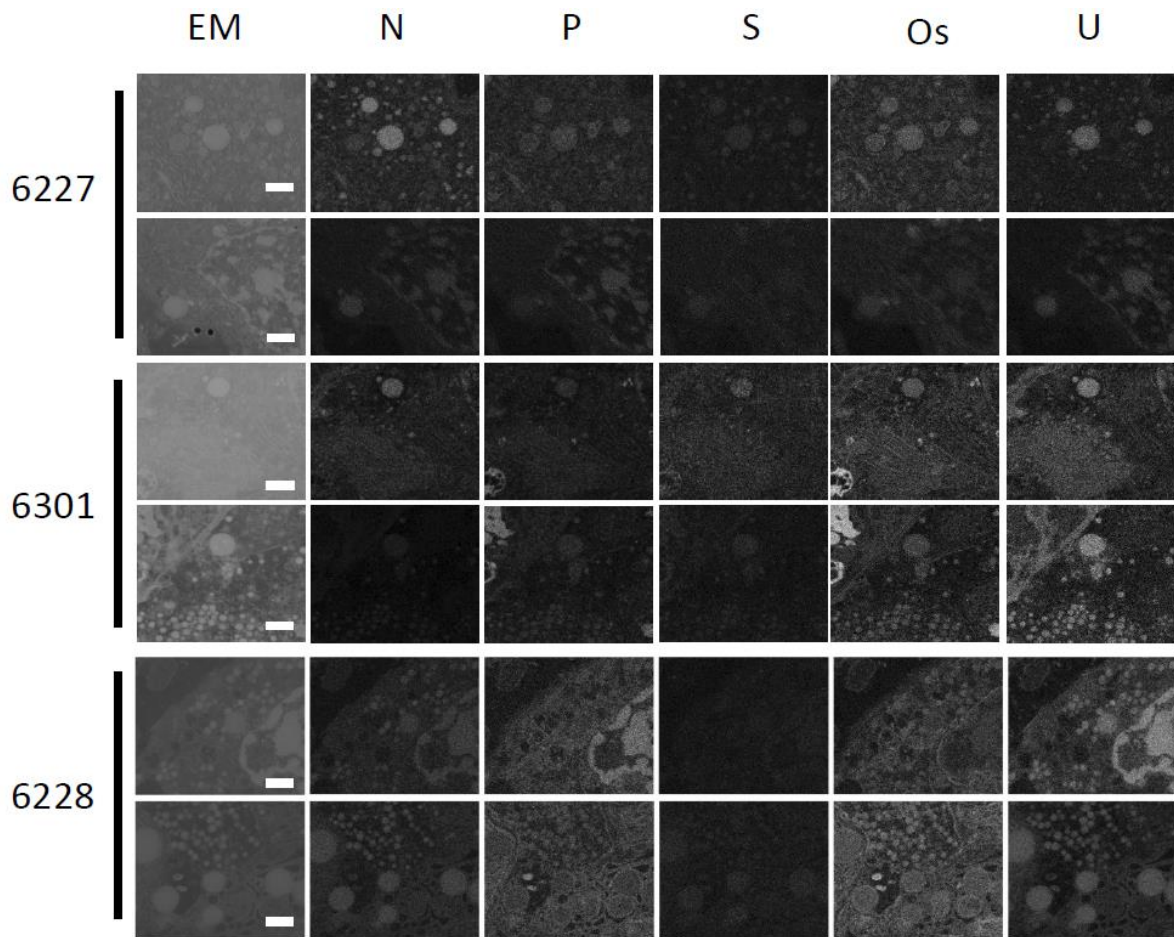

**Extended figure 2 | Raw EDX data from intermediate cells.** Element specific images displaying nitrogen (N), phosphorus (P), sulfur (S), osmium (Os), and uranium (U) are shown. Data is representative and similar to other donors with intermediate cells for the respective donor groups. See figure 3 for further details. Bars: 1  $\mu\text{m}$ , indicated in EM micrographs and identical for elemental maps.

## Supplementary information

**Table S1 | nPOD donor information.** Donor Case-IDs are indicated and data is sorted by age of demise. Information about donors are on pancreas donor region, disease duration, gender, race, body mass index (BMI), serum HbA1c (mM), serum C-peptide (ng/ml), type of autoantibodies present measured by radioimmunoassay (RIA), and human leukocyte antigen (HLA) genotype per donor. Missing data did not pass quality check or is not available.

| Condition | Case-ID | Age Demise | Region    | Duration | Gender     | Race             | BMI  | HbA1c | C peptide           | Autoantibody (RIA)                   | HLA                                                                     |
|-----------|---------|------------|-----------|----------|------------|------------------|------|-------|---------------------|--------------------------------------|-------------------------------------------------------------------------|
| Control   | 6130    | 5,2        | Head      |          | Male       | Caucasian        | 18,5 |       | 4,80                | Negative                             | A*01/03, B*07/08, DR*15/17, DQ*02/06                                    |
|           | 6232    | 14,0       | Head      |          | Female     | Caucasian        | 20,8 |       | 19,50               | Negative                             | A*02/24, B*07/44, DR*15/15, DQ*06/06                                    |
|           | 6233    | 14,0       | Head      |          | Male       | Caucasian        | 21,9 | 5,5   | 7,26                | Negative                             | A*01/26, B*38/51, DR*01/13, DQ*na/na                                    |
|           | 6374    | 14,0       | Head      |          | Female     | Caucasian        | 18,9 | 6,1   | 13,42               | Negative                             | A*01/02, B*60/55, DR*13/, DQ*06/                                        |
|           | 6153    | 15,2       | Head      |          | Male       | Hispanic/Latino  | 20,5 | 5,5   | 8,38                | Negative                             | A*24/26, B*35/38, DR*04/13, DQ*06/08                                    |
|           | 6230    | 16,0       | Body      |          | Male       | Caucasian        | 19,4 | 5,3   | 5,22                | Negative                             | A*23/32, B*44/49, DR*04/11, DQ*07/08                                    |
|           | 6227    | 17,0       | Head      |          | Female     | Caucasian        | 26,4 |       | 2,75                | Negative                             | A*02/03, B*60/62, DR*04/13, DQ*06/08                                    |
|           | 6412    | 17,6       | Head      |          | Female     | Caucasian        | 24   | 6,1   | 45,57               | Negative                             | A*01/11 B*35/62 DR*04/11 DQ*07/08                                       |
|           | 6098    | 17,8       | Head      |          | Male       | Caucasian        | 22,8 | 4,9   | 1,41                | Negative                             | A*01/32, B*08/27, DR*17/08, DQ*02/04                                    |
|           | 6417    | 18,2       | Head/Body |          | Female     | Caucasian        | 24,5 | 5,1   | 3,94                | Negative                             | A*25/31, B*18/60, DR*15/-, DQ*-/                                        |
|           | 6160    | 22,1       | Head      |          | Male       | Caucasian        | 23,9 | 5,2   | 0,40                | Negative                             | A*11/29, B*35/44, DR*103/07, DQ*02/05                                   |
|           | 6131    | 24,2       | Head      |          | Male       | Caucasian        | 24,8 |       | 1,01                | Negative                             | A*01/11, B*08/18, DR*17/17, DQ*02/02                                    |
|           | 6126    | 25,2       | Head      |          | Male       | Hispanic/Latino  | 25,1 |       | 0,88                | Negative                             | A/, B/, DR/, DQ*/                                                       |
| 6331      | 27,1    | Body       |           | Female   | African Am | 24               | 5,4  | 3,01  | Negative            | A*26/34, B*35/49, DR*18/15, DQ*04/06 |                                                                         |
| 6229      | 31,0    | Head       |           | Female   | Caucasian  | 26,9             | 5,5  | 6,23  | Negative            | A/, B/, DR/, DQ*/                    |                                                                         |
| Pregnancy | 6226    | 38,0       | Head      |          | Female     | Asian            | 27,2 | 5,3   | 3,87                | Negative                             | A*203/33, B*35/55/DR*11/14, DQ*05/07                                    |
| AAb+      | 6421    | 6,7        | Body      |          | Male       | Hispanic         | 17,9 | 5,6   | 1,84                | GADA+                                | A*02/03, B*27/62, DR*01/-, DQ*05/-                                      |
|           | 6424    | 17,7       | Head/Body |          | Male       | Caucasian        | 51,4 | 5,8   | 6,97                | GADA+ mIAA+                          | A*30/68, B*08/35, DR*17/04, DQ*02/08                                    |
|           | 6314    | 21,0       | Head/Body |          | Male       | Caucasian        | 23,8 |       | 1,49                | GADA+                                | A*02/24, B*07/35, DR*103/04, DQ*/                                       |
|           | 6397    | 21,2       | Body      |          | Female     | Caucasian        | 29,6 | 6,0   | 12,77               | GADA+                                | A*02/- B*51/62 DR*13/15 DQ*-/                                           |
|           | 6197    | 22,0       | Head      |          | Male       | African Am       | 28,2 | 5,5   | 17,48               | GADA+ IA-2A+                         | A*02/24, B*42/45, DR*07/18, DQ*02/04                                    |
|           | 6303    | 22,0       | Body      |          | Male       | Caucasian        | 31,9 | 5,4   | 3,03                | GADA+                                | A*01/11, B*08/44, DR*17/07, DQ*02/02                                    |
|           | 6433    | 24,0       | Body      |          | Male       | Hispanic         | 30,8 | 5,3   | 4,44                | GADA+                                | A*30/68, B*08/45, DR*04/12, DQ*03/03                                    |
|           | 6388    | 25,2       | Body      |          | Female     | Hispanic         | 26   | 5,7   | 1,38                | GADA+ mIAA+                          | A*02/, B*35/65, DR*01/04, DQ*05/07                                      |
|           | 6400    | 25,2       | Body      |          | Male       | Hispanic         | 22,2 | 5,5   | 4,17                | GADA+                                | A*26/31 B*08/62 DR*04/13 DQ*07/08                                       |
|           | 6301    | 26,0       | Body      |          | Male       | African Am       | 32,1 | 5,5   | 3,92                | GADA+                                | A*23/, B*07/, DR*11/13, DQ*03/06                                        |
|           | 6151    | 30,0       | Head      |          | Male       | Caucasian        | 24,2 |       | 5,49                | GADA+                                | A*02/24, B*44/44, DR*01/07, DQ*02/05                                    |
|           | 6156    | 40,0       | Head      |          | Male       | Caucasian        | 19,8 |       | 13,34               | GADA+                                | A*03/32, B*61/53, DR*01/01, DQ*05/05                                    |
|           | 6158    | 40,3       | Head      |          | Male       | Caucasian        | 29,7 | 5,6   | 0,51                | GADA+ mIAA+                          | A*03/24, B*49/62, DR*04/13, DQ*06/07                                    |
| T1D       | 6063    | 4,4        | Head      | 3,0      | Male       | Caucasian        | 23,8 | -     | <0,05               | mIAA+                                | A*02/24, B*08/62, DR*04/17, DQ*02/08                                    |
|           | 6360    | 4,8        | Body      | 2,5      | Female     | Caucasian        | 26,1 | 10,2  | <0,02               | mIAA+                                | A*31/68, B*08/39, DR*04/17, DQ*02/08                                    |
|           | 6209    | 5,0        | Head      | 0,3      | Female     | Caucasian        | 15,9 |       | 0,10                | IA-2A+ ZnT8A+ mIAA+                  | A* 01:01, 02:01 DRB1* 03:01, 04:01 DQA1* 03:01, 05:01 DQB1 02:01, 03:02 |
|           | 6380    | 11,6       | Body      | 0,0      | Female     | Adrican American | 14,6 | 13,5  | 0,22                | Negative                             | A*33/68, B*71/53, DR*17/13, DQ*02/06                                    |
|           | 6228    | 13,0       | Head/Body | 0,0      | Male       | Caucasian        | 17,4 | 13,3  | 0,10                | GADA+ IA-2A+ ZnT8A+                  | A*23/68, B*60/44, DR*17/04, DQ*02/08                                    |
|           | 6243    | 13,0       | Head      | 5,0      | Male       | Caucasian        | 21,3 | 13,1  | 0,42                | mIAA+                                | A*01/02, B*08/08, DR*17/17, DQ*02/02                                    |
|           | 6113    | 13,1       | Head      | 1,6      | Female     | Caucasian        | 24,8 |       | <0,05               | mIAA+                                | A*02/03, B*08/44, DR*01/17, DQ*02/05                                    |
|           | 6087    | 17,5       | Head      | 4,0      | Male       | Caucasian        | 21,9 |       | <0,05               | ZnT8A+ mIAA+                         | A/, B/, DR*04/17, DQ*02/08                                              |
|           | 6064    | 19,6       | Head      | 9,0      | Female     | Caucasian        | 22,6 |       | <0,05               | GADA+ IA-2A+ ZnT8A+ mIAA+            | A*02/29, B*44/62, DR*01/04, DQ*/                                        |
|           | 6337    | 20,6       | Head      | 5,0      | Female     | Caucasian        | 17,9 | 12,5  | <0,02               | mIAA+                                | A*01/33, B*08/65, DR*01/17, DQ*02/05                                    |
|           | 6198    | 22,0       | Tail      | 3,0      | Female     | Hispanic/Latino  | 23,1 |       | <0,05               | GADA+ IA-2A+ ZnT8A+ mIAA+            | A*02/30, B*18/53, DR*04/11, DQ*/                                        |
|           | 6211    | 24,0       | Body      | 4,0      | Female     | African Am       | 24,4 | 10,5  | <0,05               | GADA+ IA-2A+ ZnT8A+ mIAA+            | A*02/03, B*08/45, DR*04/12, DQ*07/08                                    |
|           | 6362    | 24,9       | Body      | 0,0      | Male       | Caucasian        | 28,5 | 10,0  | 0,38                | GADA+                                | A*03/11, B*18/35, DR*01/03, DQ*02/05                                    |
|           | 6436    | 26,3       | Body/Head | 3,0      | Male       | Caucasian        | 30,3 | 9,0   | <0,02               | IA-2A+ mIAA+                         | A*24/29, B*39/45, DR*04/13, DQ*08/06                                    |
| 6204      | 28,0    | Body       | 21,0      | Male     | Caucasian  | 23               | 7,2  | <0,05 | GADA+ mIAA+         | A*24/24, B*35/39, DR*07/08, DQ*02/04 |                                                                         |
| 6405      | 29,1    | Head       | 0,6       | Female   | Hispanic   | 42,5             | 7,0  | 1,84  | GADA+ IA-2A+ ZnT8A+ | A*30/31 B*18/61 DR*04/17 DQ*02/08    |                                                                         |
| T2D       | 6127    | 44,8       | Head      | 10,0     | Female     | Caucasian        | 30,4 |       | 0,08                | mIAA+                                | A*01/02, B*08/56, DR*04/17, DQ*02/08                                    |
|           | 6133    | 45,8       | Head      | 20,0     | Female     | Caucasian        | 40,2 |       | 0,84                | Negative                             | A*02/02, B*03/37, DR*60/10, DQ*15/05                                    |
|           | 6124    | 62,3       | Head      | 3,0      | Male       | Caucasian        | 33,7 |       | 2,85                | Negative                             | A*29/29, B*27/45, DR*04/15, DQ*06/07                                    |

**Table S2 | nPOD donor pancreas hormone content, weight and histopathology information.** Donor information is sorted by Case-IDs. Information per donor is on isles present with (Ins+) and without (Ins-) insulin, and insulinitis (yes/no); fractional insulin area (FIA; insulin area of total area as average from each region; %), fractional glucagon area (FGA, glucagon area of total area as average from each region; %), fractional areas for insulin (INS) and glucagon (GCG) content per pancreatic regions head (PH), body (PB), and tail (PT) (%); total and regional pancreas weight (grams), and histopathology information. Missing data did not pass quality check or is not available.

| Condition | Case-ID | INS+ | INS- | Insulinitis status | FIA  | FGA  | INS PH | INS PB | INS PT | GCG PH | GCG PB | GCG PT | Pancreatic Weight | Pancreatic weight head | Pancreatic weight body | Pancreatic weight tail                                                                                                                                                                                                                                                                                                                                                                                                                                                                                                                                                                                                                                   | Histopathology                                                                                                                                                                                                                                                                                                                                                                                                                                                                                                                                                                                                                                                                                              |
|-----------|---------|------|------|--------------------|------|------|--------|--------|--------|--------|--------|--------|-------------------|------------------------|------------------------|----------------------------------------------------------------------------------------------------------------------------------------------------------------------------------------------------------------------------------------------------------------------------------------------------------------------------------------------------------------------------------------------------------------------------------------------------------------------------------------------------------------------------------------------------------------------------------------------------------------------------------------------------------|-------------------------------------------------------------------------------------------------------------------------------------------------------------------------------------------------------------------------------------------------------------------------------------------------------------------------------------------------------------------------------------------------------------------------------------------------------------------------------------------------------------------------------------------------------------------------------------------------------------------------------------------------------------------------------------------------------------|
| Control   | 6098    | Yes  | No   | No                 | 0,54 | 0,36 | 0,51   | 0,49   | 0,63   | 0,34   | 0,29   | 0,44   | 91,1              | 25,5                   | 28,4                   | 37,2                                                                                                                                                                                                                                                                                                                                                                                                                                                                                                                                                                                                                                                     | Insulin+/Glucagon+ normal islets, few with vascular stasis.                                                                                                                                                                                                                                                                                                                                                                                                                                                                                                                                                                                                                                                 |
|           | 6126    | Yes  | No   | No                 | 0,83 | 0,43 | 0,91   | 0,46   | 1,11   | 0,43   | 0,21   | 0,66   | 80,2              | 18,4                   | 24,9                   | 35,3                                                                                                                                                                                                                                                                                                                                                                                                                                                                                                                                                                                                                                                     | Insulin+/Glucagon+ islets, normal. Moderate Ki67 acinar cells and occ. islets.                                                                                                                                                                                                                                                                                                                                                                                                                                                                                                                                                                                                                              |
|           | 6130    | Yes  | No   | No                 | 0,27 | 0,65 | 0,16   | 0,40   | 0,24   | 0,47   | 0,97   | 0,52   | 22,2              | 6,0                    | 8,0                    | 8,2                                                                                                                                                                                                                                                                                                                                                                                                                                                                                                                                                                                                                                                      | Insulin+/Glucagon+ normal islets; low Ki67 in acinar and islets. No infiltrates.                                                                                                                                                                                                                                                                                                                                                                                                                                                                                                                                                                                                                            |
|           | 6131    | Yes  | No   | No                 |      |      |        |        |        |        |        |        | 108,9             | 38,4                   | 38,1                   | 28,2                                                                                                                                                                                                                                                                                                                                                                                                                                                                                                                                                                                                                                                     | Insulin+/Glucagon+ islets. Occasional high islet Ki67.                                                                                                                                                                                                                                                                                                                                                                                                                                                                                                                                                                                                                                                      |
|           | 6153    | Yes  | No   | No                 | 0,80 | 0,30 | 0,45   | 1,15   |        | 0,34   | 0,22   | 0,33   | 67,8              | 22,7                   | 23,3                   | 19,9                                                                                                                                                                                                                                                                                                                                                                                                                                                                                                                                                                                                                                                     | Insulin+/Glucagon+ islets, numerous. Insulin intensity weak. High Ki67 in islets. Autolysis in head and body regions. No infiltrates or exocrine.                                                                                                                                                                                                                                                                                                                                                                                                                                                                                                                                                           |
|           | 6160    | Yes  | No   | No                 | 0,51 | 0,59 | 0,59   | 0,33   | 0,60   | 0,76   | 0,34   | 0,68   | 79,4              | 20,5                   | 23,1                   | 33,1                                                                                                                                                                                                                                                                                                                                                                                                                                                                                                                                                                                                                                                     | Insulin+/Glucagon+ islets present, all sizes. No infiltrates. Low Ki67.                                                                                                                                                                                                                                                                                                                                                                                                                                                                                                                                                                                                                                     |
|           | 6227    | Yes  | No   | No                 | 1,21 | 0,93 | 1,35   | 0,94   | 1,34   | 0,75   | 0,75   | 1,29   | 60,4              | 20,9                   | 20,1                   | 19,4                                                                                                                                                                                                                                                                                                                                                                                                                                                                                                                                                                                                                                                     | Ins+/Gluc+ islets, no abnormalities observed. Slightly increased acinar Ki67+                                                                                                                                                                                                                                                                                                                                                                                                                                                                                                                                                                                                                               |
|           | 6229    | Yes  | No   | No                 | 3,11 | 2,14 | 2,74   | 2,68   | 3,91   | 1,78   | 1,82   | 2,81   | 45,6              | 14,5                   | 16,2                   | 14,9                                                                                                                                                                                                                                                                                                                                                                                                                                                                                                                                                                                                                                                     | Insulin+/Glucagon+ islets, no abnormalities observed. Occasional islet hyperemia.                                                                                                                                                                                                                                                                                                                                                                                                                                                                                                                                                                                                                           |
|           | 6230    | Yes  | No   | No                 | 2,04 | 1,30 | 2,09   | 1,57   | 2,46   | 0,81   | 0,93   | 2,15   | 66,3              | 30,9                   | 20,0                   | 15,3                                                                                                                                                                                                                                                                                                                                                                                                                                                                                                                                                                                                                                                     | Ins+/Gluc+ islets, no abnormalities observed                                                                                                                                                                                                                                                                                                                                                                                                                                                                                                                                                                                                                                                                |
|           | 6232    | Yes  | No   | No                 | 1,79 | 1,03 | 1,73   | 1,18   | 2,47   | 0,96   | 0,73   | 1,39   | 49,4              | 14,0                   | 17,4                   | 18,0                                                                                                                                                                                                                                                                                                                                                                                                                                                                                                                                                                                                                                                     | Ins+/Gluc+ islets, numerous. No significant findings. 0-4 Ki67+ cells per islet, some non-insulin, as expected for this age. Low acinar Ki67                                                                                                                                                                                                                                                                                                                                                                                                                                                                                                                                                                |
|           | 6233    | Yes  | No   | No                 | 2,62 | 1,03 | 2,79   | 2,53   | 2,54   | 0,87   | 1,20   | 1,01   | 60,9              | 17,9                   | 19,2                   | 23,8                                                                                                                                                                                                                                                                                                                                                                                                                                                                                                                                                                                                                                                     | Insulin+/Glucagon+ islets, numerous particularly head region. Acinar Ki67 high with moderate islet Ki67 scattered islets. Very mild acute pancreatitis- small foci Ki67+ and/or CD3+ cells, peri-ductular and acinar.                                                                                                                                                                                                                                                                                                                                                                                                                                                                                       |
|           | 6331    | Yes  | No   | No                 |      |      |        |        |        |        |        |        | 102,7             | 40,7                   | 31,2                   | 30,8                                                                                                                                                                                                                                                                                                                                                                                                                                                                                                                                                                                                                                                     | Ins+/Gluc+ islets, normal numbers and morphologies. Multifocal intralobular duct ruptures due to sludge with acute pancreatitis on background of moderate chronic pancreatitis.                                                                                                                                                                                                                                                                                                                                                                                                                                                                                                                             |
|           | 6374    | Yes  | No   | No                 |      |      |        |        |        |        |        |        | 50,5              | 18,7                   | 16,0                   | 15,7                                                                                                                                                                                                                                                                                                                                                                                                                                                                                                                                                                                                                                                     | Ins+/Gluc+ islets, numerous, mostly small to medium sizes. Low islet and acinar cell Ki67+. Mild exocrine infiltrates.                                                                                                                                                                                                                                                                                                                                                                                                                                                                                                                                                                                      |
| 6412      | Yes     | No   | No   |                    |      |      |        |        |        |        |        | 80,8   | 26,1              | 25,1                   | 29,7                   | Ins+/Gluc+ islets, range of sizes including several large (400um) and with irregular outline or elongated. Islet Ki67+ cell numbers high in both endocrine and nonendocrine compartments. Acinar Ki67+ cell numbers variable from low to moderate                                                                                                                                                                                                                                                                                                                                                                                                        |                                                                                                                                                                                                                                                                                                                                                                                                                                                                                                                                                                                                                                                                                                             |
| 6417      | Yes     | No   | No   |                    |      |      |        |        |        |        |        |        |                   |                        |                        |                                                                                                                                                                                                                                                                                                                                                                                                                                                                                                                                                                                                                                                          | Ins+/Gluc+ islets, wide range of densities, sizes and numbers including many single cells, clusters, small islets to several islets <500um. Variable numbers of Ki67+ cells within islets and low numbers in exocrine regions.                                                                                                                                                                                                                                                                                                                                                                                                                                                                              |
| Pregnancy | 6226    | Yes  | No   | No                 |      |      |        |        |        |        |        |        | 86,7              | 27,5                   | 30,3                   | 28,9                                                                                                                                                                                                                                                                                                                                                                                                                                                                                                                                                                                                                                                     | Ins+/Gluc+ islets, reduced numbers otherwise no significant abnormalities. Moderate autolysis some regions                                                                                                                                                                                                                                                                                                                                                                                                                                                                                                                                                                                                  |
| AAb+      | 6151    | Yes  | No   | No                 | 0,32 | 0,48 | 0,66   | 0,13   | 0,17   | 0,62   | 0,31   | 0,53   | 25,0              | 8,7                    | 6,5                    | 7,1                                                                                                                                                                                                                                                                                                                                                                                                                                                                                                                                                                                                                                                      | Insulin+/Glucagon+ islets. No infiltrates observed. Moderate fat infiltrate head region.                                                                                                                                                                                                                                                                                                                                                                                                                                                                                                                                                                                                                    |
|           | 6156    | Yes  | No   | No                 | 0,32 | 0,57 | 0,33   | 0,20   | 0,43   | 0,58   | 0,35   | 0,78   | 72,5              | 18,6                   | 23,3                   | 27,2                                                                                                                                                                                                                                                                                                                                                                                                                                                                                                                                                                                                                                                     | Insulin+/Glucagon+ normal islets. Very mild peri-duct and acinar infiltration CD3+.                                                                                                                                                                                                                                                                                                                                                                                                                                                                                                                                                                                                                         |
|           | 6158    | Yes  | No   | No                 | 0,28 | 0,16 | 0,21   | 0,31   | 0,32   | 0,01   | 0,20   | 0,26   | 101,9             | 30,9                   | 26,8                   | 30,5                                                                                                                                                                                                                                                                                                                                                                                                                                                                                                                                                                                                                                                     | Insulin+/Glucagon+ some large. Exocrine atrophy-mild. Mild ductular dysplasia. Focal mild chronic pancreatitis.                                                                                                                                                                                                                                                                                                                                                                                                                                                                                                                                                                                             |
|           | 6197    | Yes  | Yes  | Yes                | 2,55 | 1,34 | 2,61   | 1,84   | 3,19   | 0,98   | 1,27   | 1,78   | 73,3              | 14,2                   | 38,8                   | 20,3                                                                                                                                                                                                                                                                                                                                                                                                                                                                                                                                                                                                                                                     | Insulin+/Glucagon+ islets, plentiful. Insulitis [rare] with few pseudotrophic islets. Islet hyperemia. Mild, multifocal chronic pancreatitis. Low Ki67.                                                                                                                                                                                                                                                                                                                                                                                                                                                                                                                                                     |
|           | 6301    | Yes  | No   | No                 | 2,35 | 2,50 | 2,02   | 1,92   | 3,12   | 2,12   | 1,78   | 3,62   | 46,4              | 17,8                   | 13,0                   | 15,5                                                                                                                                                                                                                                                                                                                                                                                                                                                                                                                                                                                                                                                     | Ins+/gluc+ islets, prominent, numerous, some over 500um. Mild acinar atrophy with multiple areas within each section showing acinar cell degeneration. Focal hemorrhages into parenchyma related to trauma.                                                                                                                                                                                                                                                                                                                                                                                                                                                                                                 |
|           | 6303    | Yes  | No   | No                 | 3,47 | 1,78 | 3,51   | 2,57   | 4,33   | 1,51   | 1,62   | 2,21   | 96,2              | 31,5                   | 27,9                   | 36,8                                                                                                                                                                                                                                                                                                                                                                                                                                                                                                                                                                                                                                                     | Ins+/Gluc+ islets, normal numbers and morphologies. High Ki67 islets, acinar, and duct cells. Acute pancreatitis, multifocal, mild to moderate, secondary to pancreatic duct plugging and ruptures; primarily within body but also other regions. Chronic pancreatitis, mild, with periductal fibrosis and active remodeling. Interstitial fibrosis. Lobular necrosis, mild, multifocal. Moderate multifocal hemorrhage all regions.                                                                                                                                                                                                                                                                        |
|           | 6314    | Yes  | No   | No                 |      |      |        |        |        |        |        |        | 76,6              | 21,8                   | 25,3                   | 29,6                                                                                                                                                                                                                                                                                                                                                                                                                                                                                                                                                                                                                                                     | Ins+/Gluc+ islets, numerous, several large (200-400um). Islet CD3+ infiltrates not observed. Acinar regions have no significant findings.                                                                                                                                                                                                                                                                                                                                                                                                                                                                                                                                                                   |
|           | 6388    | Yes  | No   | No                 |      |      |        |        |        |        |        |        | 101,0             | 31,7                   | 30,3                   | 39,0                                                                                                                                                                                                                                                                                                                                                                                                                                                                                                                                                                                                                                                     | Ins+/Gluc+ islets, range of sizes and morphologies within normal limits. One possible pseudotrophic islet. Acute and chronic pancreatitis, moderate, multifocal. Pancreatic duct ruptures and/or sludge within lumen. Rupture sites have severe polymorphonuclear infiltrates and mild hemorrhage and fat necrosis (acute pancreatitis). Low Ki67+ cell numbers all regions. Moderate fatty replacement acinar regions and interlobular regions.                                                                                                                                                                                                                                                            |
|           | 6397    | Yes  | No   | No                 |      |      |        |        |        |        |        |        | 70,5              | 17,3                   | 22,5                   | 30,7                                                                                                                                                                                                                                                                                                                                                                                                                                                                                                                                                                                                                                                     | Ins+/Gluc+ islets, range of normal morphologies, sizes, and numbers. Very low acinar Ki67+. Very mild lobular atrophy and perilobular fibrosis. Multifocal mild peripancreatic hemorrhage.                                                                                                                                                                                                                                                                                                                                                                                                                                                                                                                  |
|           | 6400    | Yes  | No   | No                 |      |      |        |        |        |        |        |        | 69,6              | 23,5                   | 21,2                   | 24,9                                                                                                                                                                                                                                                                                                                                                                                                                                                                                                                                                                                                                                                     | Ins+/Gluc+ islets, range of sizes and morphologies including very large (500-700um). Variable islet Ki67+ levels, primarily low. Mild global polymorphonuclear exocrine infiltrates. Preliminary- pending screening additional blocks.                                                                                                                                                                                                                                                                                                                                                                                                                                                                      |
|           | 6421    | Yes  | No   | No                 |      |      |        |        |        |        |        |        | 28,7              | 9,7                    | 9,7                    | 9,3                                                                                                                                                                                                                                                                                                                                                                                                                                                                                                                                                                                                                                                      | Ins+/Gluc+ islets, within normal range of sizes, morphologies and density between regions. No significant findings other than Panbody D2 shows high Ki67+ cell numbers in main duct epithelium.                                                                                                                                                                                                                                                                                                                                                                                                                                                                                                             |
|           | 6424    | Yes  | No   | No                 |      |      |        |        |        |        |        |        | 111,1             | 32,9                   | 43,5                   | 34,7                                                                                                                                                                                                                                                                                                                                                                                                                                                                                                                                                                                                                                                     | Ins+/Gluc+ islets, normal range of sizes (including > 300um) and morphologies. Moderate increase islet and exocrine Ki67+ cell numbers. Diffuse, mild to moderate increase in exocrine CD3/45+ cell numbers and perivascular or periductal infiltrates. Also compatible with polymorphonuclear infiltrates observed by H&E. Stellate cells are also stained by CD45. Fewer than 3 insulin-negative islets observed so presence of pseudotrophic islets not supported                                                                                                                                                                                                                                        |
|           | 6433    | Yes  | No   | No                 |      |      |        |        |        |        |        |        | 82,3              | 22,1                   | 37,9                   | 22,4                                                                                                                                                                                                                                                                                                                                                                                                                                                                                                                                                                                                                                                     | Preliminary- Ins+/Gluc+ islets, wide variation sizes, numbers, and beta-cell proportions. Variable high islet Ki67+ cell numbers, medium to larger sized islets. No pseudotrophic islets observed to date. Microadenoma P8 D4A. PanIN, low grade, multiple. Acinar atrophy with fibrosis.                                                                                                                                                                                                                                                                                                                                                                                                                   |
| T1D       | 6063    | No   | Yes  | No                 | 0,05 | 0,39 | 0,02   | 0,06   | 0,08   | 0,26   | 0,42   | 0,49   | 11,2              | 3,9                    | 2,6                    | 2,7                                                                                                                                                                                                                                                                                                                                                                                                                                                                                                                                                                                                                                                      | Insulin+/Glucagon+ islets, clusters and single cells, reduced islet numbers. Islets with possible infiltrates (<3 islets/section). Infrequent CD3+ acinar infiltrates.                                                                                                                                                                                                                                                                                                                                                                                                                                                                                                                                      |
|           | 6064    | No   | Yes  | No                 | 0,01 | 0,24 | 0,01   | 0,01   | 0,01   | 0,13   | 0,13   | 0,46   | 46,2              | 11,2                   | 16,5                   | 17,1                                                                                                                                                                                                                                                                                                                                                                                                                                                                                                                                                                                                                                                     | Insulin+/Glucagon+ islets, reduced frequency and area of islets; acute pancreatitis (PMN); Ki67+ acinar region, ducts, and infiltrating cells                                                                                                                                                                                                                                                                                                                                                                                                                                                                                                                                                               |
|           | 6087    | No   | Yes  | No                 | 0,01 | 0,57 | 0,00   | 0,04   | 0,00   | 0,33   | 0,43   | 0,96   | 58,4              | 21,8                   | 18,5                   | 17,7                                                                                                                                                                                                                                                                                                                                                                                                                                                                                                                                                                                                                                                     | Insulin+/Glucagon+ islets- reduced frequency. Mild, focal CD3+ islet infiltrates.                                                                                                                                                                                                                                                                                                                                                                                                                                                                                                                                                                                                                           |
|           | 6113    | Yes  | Yes  | Yes                | 0,02 | 0,44 | 0,01   | 0,04   | 0,01   | 0,53   | 0,30   | 0,50   | 33,5              | 11,1                   | 10,7                   | 10,2                                                                                                                                                                                                                                                                                                                                                                                                                                                                                                                                                                                                                                                     | Insulin+ (reduced)/Glucagon+ islets. Insulitis. Lobular islet heterogeneity. Islet atrophy with mild acinar atrophy (heterogeneous). Glucagon cells as single cells and small clusters.                                                                                                                                                                                                                                                                                                                                                                                                                                                                                                                     |
|           | 6198    | Yes  | Yes  | Yes                | 0,30 | 1,79 |        |        | 0,30   |        |        | 1,79   |                   |                        |                        |                                                                                                                                                                                                                                                                                                                                                                                                                                                                                                                                                                                                                                                          | Insulin+/Glucagon+ islets. Diffuse mild insulitis (increase in CD3+cells/islet rather than focal aggregates). Moderate to high acinar Ki67+, low islet. Mild diffuse chronic pancreatitis. Mild acinar atrophy and ductular proliferation.                                                                                                                                                                                                                                                                                                                                                                                                                                                                  |
|           | 6204    | No   | Yes  | No                 | 0,01 | 2,75 | 0,02   | 0,01   |        |        | 2,41   | 3,08   | 55,0              | 25,8                   | 19,0                   | 10,2                                                                                                                                                                                                                                                                                                                                                                                                                                                                                                                                                                                                                                                     | Insulin-/Glucagon+ islets. High duct and exocrine Ki67. Small duct plugging with rupture. Hemorrhage and acinar degeneration/necrosis with other areas of mild exocrine atrophy. Acute and chronic pancreatitis.                                                                                                                                                                                                                                                                                                                                                                                                                                                                                            |
|           | 6209    | Yes  | Yes  | Yes                | 0,17 | 2,17 | 0,14   | 0,22   | 0,14   | 1,07   | 1,91   | 3,54   | 12,5              | 4,7                    | 4,5                    | 3,3                                                                                                                                                                                                                                                                                                                                                                                                                                                                                                                                                                                                                                                      | Insulin+ (reduced)/Glucagon+ islets with insulitis. Low Ki67 in all cell types. No pancreatitis. Moderate autolysis.                                                                                                                                                                                                                                                                                                                                                                                                                                                                                                                                                                                        |
|           | 6211    | Yes  | Yes  | No                 | 0,09 | 1,97 | 0,04   | 0,06   | 0,18   | 0,93   | 1,68   | 3,30   | 33,0              | 11,0                   | 12,0                   | 10,0                                                                                                                                                                                                                                                                                                                                                                                                                                                                                                                                                                                                                                                     | Ins+ (reduced)/Gluc+ islets, numerous. Alpha cells in ducts appear more frequent than expected. Very mild chronic pancreatitis- infrequent, lobular                                                                                                                                                                                                                                                                                                                                                                                                                                                                                                                                                         |
|           | 6228    | Yes  | Yes  | Yes                | 0,34 | 1,45 | 0,11   | 0,50   | 0,40   | 1,10   | 1,57   | 1,68   | 30,4              | 11,2                   | 10,8                   | 8,5                                                                                                                                                                                                                                                                                                                                                                                                                                                                                                                                                                                                                                                      | Insulin+/Glucagon+ islets of various morphologies including normal appearing, fibrotic, degenerating, and with insulitis with infiltrate that includes eosinophils. Some pseudotrophic (glucagon+ only) islets. Very mild, multifocal exocrine atrophy. Mild, multifocal mononuclear infiltrate with focally moderate (chronic pancreatitis) increased exocrine and endocrine Ki67+. Eosinophils observed within islets and in exocrine areas in increased numbers.                                                                                                                                                                                                                                         |
|           | 6243    | Yes  | Yes  | Yes                | 0,50 | 2,21 | 0,48   | 0,38   | 0,65   | 1,55   | 1,96   | 3,10   | 29,4              | 10,4                   | 10,5                   | 8,5                                                                                                                                                                                                                                                                                                                                                                                                                                                                                                                                                                                                                                                      | Ins+/Gluc+ islets and single beta-cells (reduced numbers but present throughout all blocks), glucagon+ only islets (pseudotrophic). Insulitis present particularly PanTail. Low normal Ki67 islets and acinar cells. Variable mild fatty exocrine infiltration. Hydropic degeneration in scattered islets within most regions. Diffuse moderate CD3+ exocrine infiltrates and Ki67+ immune cells.                                                                                                                                                                                                                                                                                                           |
|           | 6337    | Yes  | Yes  | No                 |      |      |        |        |        |        |        |        | 26,8              | 7,8                    | 10,2                   | 8,8                                                                                                                                                                                                                                                                                                                                                                                                                                                                                                                                                                                                                                                      | Ins+ (rare)/Gluc+ islets, reduced numbers and sizes. Moderate acinar atrophy. Minimal exocrine CD3+ infiltrates and low Ki67+ acinar cells. Severe focal duodenal ulceration- denuded epithelium, acute mixed infiltrate with hemorrhage, necrosis, suppuration with extension into muscular layers.                                                                                                                                                                                                                                                                                                                                                                                                        |
|           | 6360    | No   | Yes  | No                 |      |      |        |        |        |        |        |        | 10,3              | 3,2                    | 3,5                    | 3,6                                                                                                                                                                                                                                                                                                                                                                                                                                                                                                                                                                                                                                                      | Ins-/Gluc+ islets, reduced numbers, mostly small. Somatostatin may be slightly increased (# cells/islet). Low Ki67 acinar cells and ducts. Mild CD3+ exocrine infiltrates head and body regions. Mild acinar atrophy and periductal fibrosis.                                                                                                                                                                                                                                                                                                                                                                                                                                                               |
|           | 6362    | Yes  | Yes  | Yes                | 0,30 | 1,37 | 0,20   | 0,20   | 0,47   | 0,84   | 1,06   | 2,22   | 53,3              | 13,1                   | 17,2                   | 23,0                                                                                                                                                                                                                                                                                                                                                                                                                                                                                                                                                                                                                                                     | Ins+/Gluc+ islets, moderate reduction numbers of Ins+ islets. Many islets with abnormal morphologies (large, fusing smaller islets, irregular outlines, fibrosis) in contrast to normal spherical/oblong islet morphologies. Insulitis in most Ins+ islets and small number of Ins- islets. Islet nuclear pleomorphism with variable hydropic degeneration. Adipose cells are also associated with islets. Generally low islet Ki67+ but occasional islet with high Ki67+ in non-beta cells. Moderate to high acinar Ki67+ cells. Mild to moderate acinar CD3+ infiltrates and variable fatty infiltration. Moderate exocrine atrophy with variable intralobular fibrosis. Amyloid in rare islets, PanTail. |
| 6380      | Yes     | Yes  | Yes  |                    |      |      |        |        |        |        |        | 34,3   | 10,5              | 14,3                   | 9,4                    | Ins+ (reduced)/Gluc+ islets, mostly small and reduced numbers. Pseudotrophic islets (insulin-negative) are highly variable with expected heterogeneity in lobular distribution. Variable moderate Ki67+ cells in all exocrine regions with rare islet observed with moderate Ki67+ cell numbers. Possible insulitis seen in both insulin+ and insulin- islets with rarely more than 6 CD3+ cells diffusely associated with islet periphery. CD45+ cells diffusely increased exocrine regions with mild to moderate increase in polymorphonuclear cells, particularly eosinophils. Most infiltrates appear perivascular. No fibrosis or exocrine atrophy. |                                                                                                                                                                                                                                                                                                                                                                                                                                                                                                                                                                                                                                                                                                             |
| 6405      | Yes     | Yes  | Yes  |                    |      |      |        |        |        |        |        | 94,3   | 34,3              | 29,8                   | 30,3                   | Ins+/Gluc+ (majority) with normal sizes and morphologies. Ins-/Gluc+ islets as scattered small islets or within certain lobules. Insulitis present all regions. Variable peri-islet fibrosis. Acute pancreatitis (PH O1A). Lobules with moderate acinar Ki67+ cell numbers. Fatty infiltration highly variable between lobules given block. Multiple small foci of lobular fibrosis with low grade PanIN. Multifocal squamous metaplasia in small intralobular ducts.                                                                                                                                                                                    |                                                                                                                                                                                                                                                                                                                                                                                                                                                                                                                                                                                                                                                                                                             |
| 6436      | Yes     | Yes  | No   |                    |      |      |        |        |        |        |        | 57,1   | 20,1              | 17,2                   | 19,8                   | Ins+/Gluc+ islets with hypertrophy and Ins+ clusters and single BC. Insulitis at Ins- and Ins- islets. Islet hypertrophy and irregular morphologies. Amyloid in at least 1 islet (PT). Peri-pancreatic trauma with acute pancreatitis PB 02-04 with evidence of low grade PanIN in regions with interstitial fibrosis (mild chronic pancreatitis PH 04B).                                                                                                                                                                                                                                                                                                |                                                                                                                                                                                                                                                                                                                                                                                                                                                                                                                                                                                                                                                                                                             |
| T2D       | 6124    | Yes  | No   | No                 | 0,28 | 0,63 | 0,28   | 0,31   | 0,25   | 0,39   | 0,92   | 0,59   | 103,9             | 36,3                   | 22,0                   | 38,1                                                                                                                                                                                                                                                                                                                                                                                                                                                                                                                                                                                                                                                     | Insulin+/Glucagon+, normal islet density. Hypertrophied islets. Amyloid. Acinar atrophy- moderate to severe. Peri-islet fibrosis.                                                                                                                                                                                                                                                                                                                                                                                                                                                                                                                                                                           |
|           | 6127    | Yes  | Yes  | No                 | 0,04 | 0,82 | 0,07   | 0,03   | 0,03   | 1,25   | 0,58   | 0,63   | 58,9              | 21,2                   | 16,7                   | 15,5                                                                                                                                                                                                                                                                                                                                                                                                                                                                                                                                                                                                                                                     | Insulin+ (reduced)/Glucagon+ islets. Mild adiposity exocrine regions. Low Ki67. Pseudotrophic islets and severe amyloid confirmed with additional IHC and Congo Red stains as well as infiltrating CD3+ cells in islets, with and without insulin and amyloid.                                                                                                                                                                                                                                                                                                                                                                                                                                              |
|           | 6133    | Yes  | No   | No                 | 0,17 | 0,19 | 0,26   | 0,09   | 0,15   | 0,06   | 0,15   | 0,37   | 70,4              | 31,1                   | 17,2                   | 19,0                                                                                                                                                                                                                                                                                                                                                                                                                                                                                                                                                                                                                                                     | Insulin+/Glucagon+ islets, many w/ amyloid. Multifocal duct epithelium Ki67+. Mild, interstitial CD3+ infiltrate. Duct sludge and acute pancreatitis. Severe exocrine atrophy and arteriosclerosis. Fatty replacement of exocrine tissues with multifocal fat necrosis.                                                                                                                                                                                                                                                                                                                                                                                                                                     |
