# Supplementary material for: Large-scale electron microscopy database for human type 1 diabetes
Source: PubMed Central journal article supplement (PMC7235089; doi:10.1038/s41467-020-16287-5), 2020-05-18
Supplement: 41467_2020_16287_MOESM3_ESM.pdf [file 41467_2020_16287_MOESM3_ESM.pdf]

## Description of Additional Supplementary Files

**File Name:** Supplementary Data 1

**Description:** Supplementary dataset file: Extended EDX data and information on diabetes-related donor parameters are available in the supplementary dataset file.
